# Supplementary material for: Identification and removal of a cryptic impurity in pomalidomide-PEG based PROTAC
Source: publisher site journal article supplement (doi:10.3762/bjoc.21.28), 2025-02-18
Supplement: Additional file 1 [file 1860-5397-21-28-S1.pdf]

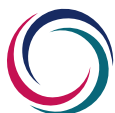

## Supporting Information

for

### Identification and removal of a cryptic impurity in pomalidomide-PEG based PROTAC

Bingnan Wang, Yong Lu and Chuo Chen

*Beilstein J. Org. Chem.* **2025**, *21*, 407–411. [doi:10.3762/bjoc.21.28](https://doi.org/10.3762/bjoc.21.28)

**Computational details, general experimental information, synthetic procedures, compound characterization data, and copies of NMR spectra**

## Table of contents

|                       |     |
|-----------------------|-----|
| Computational details | S1  |
| General information   | S6  |
| Synthetic procedures  | S7  |
| NMR spectra           | S11 |

## Computational details

The computations were performed on Spartan '18 (Wavefunction, Inc. Irvine, CA) suite of programs using DFT at the  $\omega$ B97X-D/6-311+G\*\* level wherein the natural charges were obtained from a natural population analysis and the electrostatic charges calculated based on the CHELP algorithm with a standard shell thickness of 5.5 au.

### Thalidomide

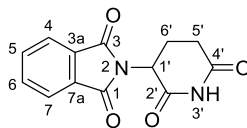

| Atom label | Natural charge | Electrostatic charge |
|------------|----------------|----------------------|
| C1         | 0.727          | 0.491                |
| C3         | 0.728          | 0.523                |
| C3a        | -0.116         | -0.020               |
| C4         | -0.162         | -0.156               |
| C5         | -0.184         | -0.106               |
| C6         | -0.182         | -0.096               |
| C7         | -0.162         | -0.168               |
| C7a        | -0.115         | 0.014                |
| C1'        | -0.111         | 0.271                |
| C2'        | 0.718          | 0.571                |
| C4'        | 0.718          | 0.756                |
| C5'        | -0.485         | -0.539               |
| C6'        | -0.404         | -0.162               |
| H4         | 0.234          | 0.160                |
| H5         | 0.217          | 0.137                |
| H6         | 0.217          | 0.136                |
| H7         | 0.234          | 0.160                |
| H1'        | 0.262          | 0.078                |
| H5'a       | 0.233          | 0.172                |
| H5'e       | 0.246          | 0.200                |
| H6'a       | 0.234          | 0.133                |
| H6'e       | 0.222          | 0.108                |
| HN3'       | 0.426          | 0.390                |
| N2         | -0.538         | -0.448               |
| N3'        | -0.672         | -0.665               |
| O1         | -0.565         | -0.453               |
| O3         | -0.564         | -0.471               |
| O2'        | -0.579         | -0.478               |
| O4'        | -0.581         | -0.541               |

## 4-Fluorothalidomide

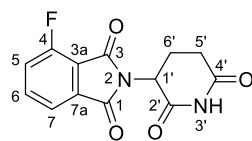

| Atom label | Natural charge | Electrostatic charge |
|------------|----------------|----------------------|
| C1         | 0.724          | 0.533                |
| C3         | 0.731          | 0.650                |
| C3a        | -0.188         | -0.271               |
| C4         | 0.465          | 0.453                |
| C5         | -0.253         | -0.348               |
| C6         | -0.163         | -0.003               |
| C7         | -0.181         | -0.248               |
| C7a        | -0.090         | 0.066                |
| C1'        | -0.111         | 0.183                |
| C2'        | 0.718          | 0.608                |
| C4'        | 0.719          | 0.765                |
| C5'        | -0.485         | -0.559               |
| C6'        | -0.403         | -0.137               |
| F4         | -0.323         | -0.213               |
| H5         | 0.235          | 0.205                |
| H6         | 0.221          | 0.138                |
| H7         | 0.238          | 0.175                |
| H1'        | 0.263          | 0.095                |
| H5'a       | 0.234          | 0.182                |
| H5'e       | 0.247          | 0.202                |
| H6'a       | 0.233          | 0.135                |
| H6'e       | 0.223          | 0.112                |
| HN3'       | 0.426          | 0.389                |
| N2         | -0.537         | -0.490               |
| N3'        | -0.672         | -0.670               |
| O1         | -0.562         | -0.458               |
| O3         | -0.547         | -0.471               |
| O2'        | -0.579         | -0.484               |
| O4'        | -0.580         | -0.540               |

## Pomalidomide

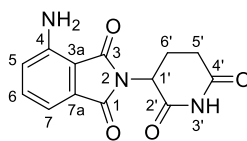

| Atom label | Natural charge | Electrostatic charge |
|------------|----------------|----------------------|
| C1         | 0.729          | 0.524                |
| C3         | 0.731          | 0.617                |
| C3a        | -0.195         | -0.298               |
| C4         | 0.230          | 0.511                |
| C5         | -0.242         | -0.375               |
| C6         | -0.156         | -0.008               |
| C7         | -0.211         | -0.272               |
| C7a        | -0.083         | 0.067                |
| C1'        | -0.111         | 0.192                |
| C2'        | 0.718          | 0.593                |
| C4'        | 0.719          | 0.769                |
| C5'        | -0.484         | -0.570               |
| C6'        | -0.403         | -0.106               |
| H5         | 0.212          | 0.186                |
| H6         | 0.215          | 0.133                |
| H7         | 0.233          | 0.171                |
| H1'        | 0.261          | 0.090                |
| H5'a       | 0.232          | 0.179                |
| H5'e       | 0.246          | 0.201                |
| H6'a       | 0.234          | 0.125                |
| H6'e       | 0.222          | 0.102                |
| HN3'       | 0.425          | 0.389                |
| HN4a       | 0.389          | 0.395                |
| HN4b       | 0.418          | 0.398                |
| N2         | -0.538         | -0.459               |
| N3'        | -0.672         | -0.666               |
| O1         | -0.566         | -0.460               |
| O3         | -0.605         | -0.510               |
| O2'        | -0.579         | -0.489               |
| O4'        | -0.583         | -0.545               |
| N4         | -0.787         | -0.884               |

## *N*-Methyl-3-fluorophthalimide

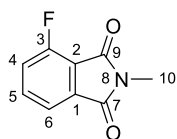

| Atom label | Natural charge | Electrostatic charge |
|------------|----------------|----------------------|
| C1         | -0.092         | -0.034               |
| C2         | -0.189         | -0.266               |
| C3         | 0.460          | 0.470                |
| C4         | -0.255         | -0.347               |
| C5         | -0.166         | -0.034               |
| C6         | -0.186         | -0.184               |
| C7         | 0.711          | 0.497                |
| C9         | 0.715          | 0.530                |
| C10        | -0.373         | -0.652               |
| F3         | -0.325         | -0.219               |
| H4         | 0.234          | 0.204                |
| H5         | 0.220          | 0.141                |
| H6         | 0.237          | 0.164                |
| H10a       | 0.212          | 0.223                |
| H10b       | 0.209          | 0.223                |
| H10c       | 0.228          | 0.237                |
| N8         | -0.529         | -0.040               |
| O7         | -0.565         | -0.468               |
| O9         | -0.547         | -0.445               |

## General information

All solvents for the synthesis were purified by passing commercially available pre-dried, oxygen-free formulations through activated alumina columns. Reactions were monitored by TLC or LC-MS and the products were purified by flash column chromatography unless otherwise mentioned. NMR spectra were recorded on a Bruker AN400 or AN600 instrument. The chemical shifts of the  $^1\text{H}$  NMR spectra are reported in ppm ( $\delta$ ) relative to the  $^1\text{H}$  signals in the solvent ( $\text{CDCl}_3$ :  $\delta$  7.26 ppm; MeOD:  $\delta$  3.31 ppm) and the multiplicities are presented as follows: s = singlet, d = doublet, t = triplet, q = quartet, m = multiplet. LC-MS was performed on an Agilent 1260 HPLC machine coupled to a 6120 single quadrupole MS detector using an Agilent Eclipse XDB-C18 5  $\mu\text{m}$  4.6  $\times$  150 mm column. HRMS was performed on a Sciex TripleTOF 6600 mass spectrometer coupled to Shimadzu HPLC (Nexera X2 LC-30AD).

## Synthetic procedures

### Synthesis of *i*Veliparib-AP6

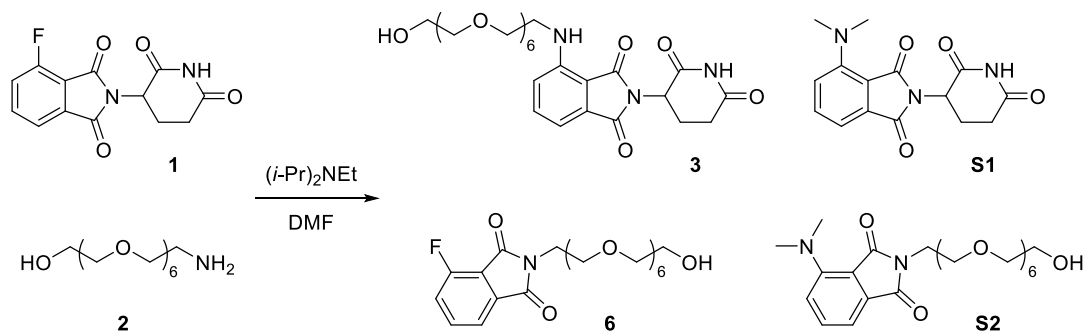

To a 4 mL clear glass vial charged with **1** (85 mg, 0.308 mmol, 1.0 equiv) in *N,N*-dimethylformamide (1 mL) was added **2** (71 mg, 0.308 mmol, 1.0 equiv) and *N,N*-diisopropylethylamine (40 mg, 0.308 mmol, 1.0 equiv, 54  $\mu$ L) at 23  $^{\circ}$ C. After stirring at 90  $^{\circ}$ C overnight, the solution was concentrated. The residue was diluted with methylene chloride (10 mL) and washed with saturated aqueous sodium bicarbonate solution (10 mL). The layers were separated, and the aqueous layer was extracted with methylene chloride (3  $\times$  10 mL). The combined organic layers were dried with anhydrous sodium sulfate, concentrated, and purified by flash column chromatography on silica gel (methanol/methylene chloride 1:10) to afford a mixture of **3** and **6** (92 mg, 54%, 3:1 by  $^1$ H NMR) as a yellow oil, **1** (14 mg, 16%) as a white solid, **S1** (18 mg, 19%) as a yellow oil, and **S2** (13 mg, 8%) as a yellow oil.

To a 4 mL clear glass vial charged with the resulting mixture of **3** and **6** in *N,N*-dimethylformamide (1 mL) was added taurine (20 mg, 0.158 mmol, 1.0 equiv) and *N,N*-diisopropylethylamine (41 mg, 0.316 mmol, 2.0 equiv, 30  $\mu$ L) at 23  $^{\circ}$ C. After stirring at 90  $^{\circ}$ C for 30 h, the solution was concentrated. The residue was diluted with methylene chloride (5 mL) and washed with saturated aqueous sodium bicarbonate (5 mL). The layers were separated, and the aqueous layer was extracted with methylene chloride (3  $\times$  5 mL). The combined organic layers were dried with anhydrous sodium sulfate and concentrated to afford **3** (73 mg, 41%) as a yellow oil [*Nat. Chem. Biol.* **2019**, *15*, 1223].

**S1**:  $R_f$  = 0.35 (silica gel, methanol/methylene chloride 1:10);  $^1$ H NMR (400 MHz,  $\text{CDCl}_3$ )  $\delta$  8.56 (s, 1H), 7.70 (t,  $J$  = 7.7 Hz, 1H), 7.59 (d,  $J$  = 7.1 Hz, 1H), 7.52 (d,  $J$  = 8.2 Hz, 1H), 5.01 (dd,  $J$  = 11.9, 5.2 Hz, 1H), 3.25 (s, 6H), 2.99 – 2.69 (m, 3H), 2.22 – 2.09 (m, 1H);  $^{13}$ C NMR (150 MHz,  $\text{CDCl}_3$ )  $\delta$  171.8, 168.5, 166.7, 166.2, 146.2, 136.3, 134.5, 125.2, 119.1, 118.1, 49.5, 44.4 (2C), 31.4, 22.6; MS (ESI): calculated for  $\text{C}_{15}\text{H}_{16}\text{N}_3\text{O}_4$  (M+H) $^+$  302.1, found 302.1.

**S2**:  $R_f$  = 0.25 (silica gel, methanol/methylene chloride 1:10);  $^1$ H NMR (400 MHz,  $\text{CDCl}_3$ )  $\delta$  7.57 (t,  $J$  = 7.7 Hz, 1H), 7.51 – 7.35 (m, 2H), 3.87 (t,  $J$  = 5.9 Hz, 2H), 3.75 – 3.57 (m, 28H), 3.16 (s, 6H);  $^{13}$ C NMR (150 MHz,  $\text{CDCl}_3$ )  $\delta$  167.3, 161.9, 136.2, 135.4, 135.1, 124.4, 117.7, 115.9, 72.6, 70.71, 70.67, 70.65 (3C), 70.62 (2C), 70.60, 70.4, 70.1, 68.0, 61.8, 44.1 (2C), 37.4; MS (ESI): calculated for  $\text{C}_{24}\text{H}_{39}\text{N}_2\text{O}_9$  (M+H) $^+$  499.3, found 499.3.

**3**:  $R_f$  = 0.20 (silica gel, methanol/methylene chloride 1:10);  $^1$ H NMR (600 MHz,  $\text{CDCl}_3$ )  $\delta$  8.90 (s, 1H), 7.46 (dd,  $J$  = 8.5, 7.2 Hz, 1H), 7.06 (d,  $J$  = 7.2 Hz, 1H), 6.89 (d,  $J$  = 8.5 Hz, 1H), 4.89 (dd,  $J$  = 12.3, 5.4 Hz, 1H), 3.69 (dd,  $J$  = 7.1, 4.1 Hz, 4H), 3.63 (dd,  $J$  = 10.4, 4.6 Hz, 20H), 3.59 – 3.56 (m, 2H), 3.44 (q,  $J$  = 5.5 Hz, 2H), 2.87 – 2.80



(m, 1H), 2.82 – 2.66 (m, 2H), 2.12 – 2.05 (m, 1H);  $^{13}\text{C}$  NMR (150 MHz,  $\text{CDCl}_3$ )  $\delta$  171.5, 169.3, 168.7, 167.8, 146.9, 136.1, 132.6, 116.9, 111.8, 110.4, 72.7, 70.8, 70.70, 70.65, 70.64, 70.61 (2C), 70.57, 70.56, 70.51, 70.3, 69.5, 61.7, 49.0, 42.5, 31.6, 22.9; HRMS (ESI): calculated for  $\text{C}_{27}\text{H}_{40}\text{N}_3\text{O}_{11}$  ( $\text{M}+\text{H}$ ) $^+$  582.2657, found 582.2677.

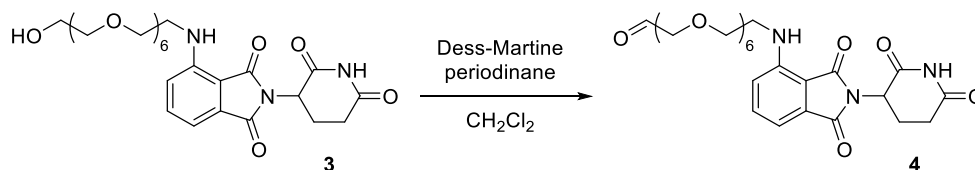

To a 12 mL clear glass vial charged with **3** (525 mg, 0.90 mmol, 1.0 equiv) in methylene chloride (10 mL) was added Dess–Martin periodinane (594 mg, 1.4 mmol, 1.5 equiv) at 0 °C. After stirring at 23 °C for 2 h, the reaction was quenched with saturated aqueous sodium bicarbonate (5 mL) and saturated aqueous sodium thiosulfate (5 mL). The layers were separated, and the aqueous layer was extracted with methylene chloride (3  $\times$  10 mL). The combined organic layers were dried with anhydrous sodium sulfate, concentrated, and purified by flash column chromatography on silica gel (methanol/methylene chloride 1:10) to afford **4** (290 mg, 55%) as a yellow oil [*Nat. Chem. Biol.* **2019**, *15*, 1223]:  $R_f$  = 0.25 (silica gel, methanol/methylene chloride 1:10);  $^1\text{H}$  NMR (400 MHz,  $\text{CDCl}_3$ )  $\delta$  9.71 (s, 1H), 8.50 (s, 1H), 7.48 (dd,  $J$  = 8.5, 7.1 Hz, 1H), 7.09 (d,  $J$  = 7.1 Hz, 1H), 6.91 (d,  $J$  = 8.5 Hz, 1H), 6.48 (brs, 1H), 4.90 (dd,  $J$  = 12.0, 5.5 Hz, 1H), 4.15 (s, 2H), 3.78 – 3.59 (m, 22H), 3.46 (t,  $J$  = 5.3 Hz, 2H), 2.92 – 2.66 (m, 3H), 2.16 – 2.06 (m, 1H);  $^{13}\text{C}$  NMR (150 MHz,  $\text{CDCl}_3$ )  $\delta$  201.1, 171.5, 169.4, 168.6, 167.8, 146.9, 136.1, 132.6, 116.9, 111.7, 110.4, 72.7, 71.3, 70.82, 70.77, 70.72, 70.68, 70.64 (2C), 70.55, 70.3, 69.5, 61.7, 49.0, 42.5, 31.5, 22.9; HRMS (ESI): calculated for  $\text{C}_{27}\text{H}_{38}\text{N}_3\text{O}_{11}$  ( $\text{M}+\text{H}$ ) $^+$  580.2501, found 580.2518.

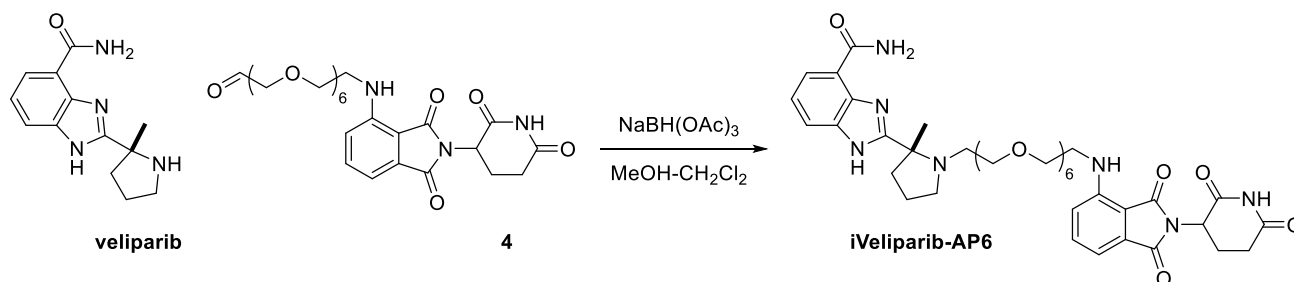

To a 4 mL clear glass vial charged with **4** (58 mg, 0.10 mmol, 1.0 equiv) in a mixture of methylene chloride (1 mL) and methanol (1 mL) was added veliparib (24 mg, 0.10 mmol, 1.0 equiv) followed by sodium triacetoxyborohydride (42 mg, 0.20 mmol, 2.0 equiv) at 0 °C. After stirring at 23 °C overnight, the solution was concentrated and purified by flash column chromatography on silica gel (methanol/methylene chloride 1:10) to afford iVeliparib-AP6 (44 mg, 54%) as a yellow oil [*Nat. Chem. Biol.* **2019**, *15*, 1223]:  $R_f$  = 0.20 (silica gel, methanol/methylene chloride 1:10);  $^1\text{H}$  NMR (400 MHz, MeOD)  $\delta$  8.01 (d,  $J$  = 7.6 Hz, 1H), 7.77 (d,  $J$  = 8.1 Hz, 1H), 7.54 – 7.48 (m, 1H), 7.43 (t,  $J$  = 7.8 Hz, 1H), 7.07 – 6.98 (m, 2H), 5.03 (dd,  $J$  = 12.4, 5.4 Hz, 1H), 4.08 (brs, 1H), 3.85 (s, 2H), 3.73 – 3.33 (m, 28H), 2.92 – 2.78 (m, 1H), 2.79 – 2.63 (m, 2H), 2.59 – 2.22 (m, 4H), 2.10 (tdd,  $J$  = 8.3, 5.6, 2.8 Hz, 1H), 1.90 (s, 3H);  $^{13}\text{C}$  NMR (150 MHz, MeOD)  $\delta$  174.7, 171.6, 170.6, 169.5, 169.2, 148.1, 140.8, 137.3, 136.9, 133.7, 125.2, 124.6, 123.2, 118.3, 117.5, 114.5, 112.0, 111.1, 71.8, 71.53, 71.49, 71.47, 71.44,

71.42, 71.40, 71.3, 71.2, 70.5, 66.6, 53.2, 52.6, 50.2, 43.2, 38.9, 32.2, 23.8, 21.7, 18.3; HRMS (ESI): calculated for  $C_{40}H_{54}N_7O_{11}$  ( $M+H$ )<sup>+</sup> 808.3876, found 808.3911.

### Synthesis of impurity 5

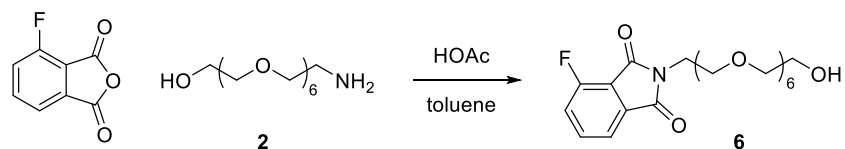

To a 4 mL clear glass vial charged with 3-fluorophthalic anhydride (17 mg, 0.10 mmol, 1.0 equiv) in a mixture of acetic acid (0.2 mL) and toluene (0.4 mL) was added **2** (33 mg, 0.10 mmol, 1.0 equiv) at 23 °C. After stirring at 80 °C overnight, the solution was concentrated. The residue was diluted with methylene chloride (5 mL) and washed with saturated aqueous sodium bicarbonate (5 mL). The layers were separated, and the aqueous layer was extracted with methylene chloride (3 × 5 mL). The combined organic layers were dried with anhydrous sodium sulfate, concentrated, and purified with flash column chromatography on silica gel (methanol/methylene chloride 1:10) to afford **6** (18 mg, 38%) as a colorless oil:  $R_f$  = 0.20 (silica gel, methanol/methylene chloride 1:10);  $^1H$  NMR (400 MHz,  $CDCl_3$ )  $\delta$  7.68 (ddd,  $J$  = 8.3, 7.3, 4.3 Hz, 1H), 7.61 (d,  $J$  = 7.2 Hz, 1H), 7.33 (td,  $J$  = 8.5, 0.9 Hz, 1H), 3.83 (t,  $J$  = 5.8 Hz, 2H), 3.74 – 3.49 (m, 27H), 3.04 (s, 1H);  $^{13}C$  NMR (150 MHz,  $CDCl_3$ )  $\delta$  167.1 (d,  $J$  = 2.8 Hz), 164.9, 157.5 (d,  $J$  = 265.6 Hz), 136.6 (d,  $J$  = 7.6 Hz), 134.3, 122.4 (d,  $J$  = 19.7 Hz), 119.5 (d,  $J$  = 3.5 Hz), 117.8 (d,  $J$  = 12.5 Hz), 72.6, 70.6, 70.52, 70.49 (3C), 70.47 (2C), 70.45, 70.2, 70.0, 67.7, 61.6, 37.4;  $^{19}F$  NMR (565 MHz,  $CDCl_3$ )  $\delta$  -113.1; HRMS (ESI): calculated for  $C_{22}H_{33}FNO_9$  ( $M+H$ )<sup>+</sup> 474.2134, found 474.2147.

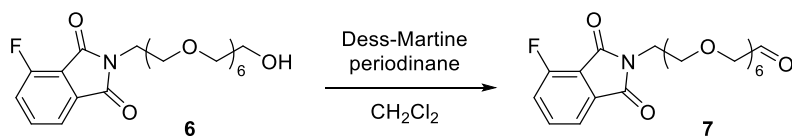

To a 4 mL clear glass vial charged with **6** (18 mg, 0.038 mmol, 1.0 equiv) in methylene chloride (1 mL) was added Dess–Martin periodinane (48 mg, 0.11 mmol, 3.0 equiv) at 0 °C. After stirring at 23 °C for 2 h, the solution was quenched with saturated aqueous sodium bicarbonate (1 mL) and saturated aqueous sodium thiosulfate (1 mL). The layers were separated, and the aqueous layer was extracted with methylene chloride (3 × 5 mL). The combined organic layers were dried with anhydrous sodium sulfate, concentrated, and purified by flash column chromatography on silica gel (methanol/methylene chloride 1:10) to afford **7** (9.0 mg, 50%) as a colorless oil:  $R_f$  = 0.25 (silica gel, methanol/methylene chloride 1:10);  $^1H$  NMR (600 MHz,  $CDCl_3$ )  $\delta$  9.72 (t,  $J$  = 0.9 Hz, 1H), 7.71 (ddd,  $J$  = 8.2, 7.3, 4.3 Hz, 1H), 7.66 (dd,  $J$  = 7.3, 0.8 Hz, 1H), 7.37 (td,  $J$  = 8.5, 0.9 Hz, 1H), 4.16 (d,  $J$  = 0.8 Hz, 1H), 3.88 (t,  $J$  = 5.8 Hz, 2H), 3.75 – 3.68 (m, 5H), 3.66 – 3.57 (m, 19H);  $^{13}C$  NMR (150 MHz,  $CDCl_3$ )  $\delta$  201.1, 167.1 (d,  $J$  = 2.7 Hz), 165.0, 157.5 (d,  $J$  = 265.6 Hz), 136.6 (d,  $J$  = 7.4 Hz), 134.4, 122.4 (d,  $J$  = 19.9 Hz), 119.5 (d,  $J$  = 3.7 Hz), 117.9 (d,  $J$  = 12.4 Hz), 71.2, 70.8, 70.65, 70.61, 70.57, 70.55 (3C), 70.53 (2C), 70.0, 67.8, 37.4;  $^{19}F$  NMR (376 MHz,  $CDCl_3$ )  $\delta$  -113.0; HRMS (ESI): calculated for  $C_{22}H_{31}FNO_9$  ( $M+H$ )<sup>+</sup> 472.1977, found 472.1973.

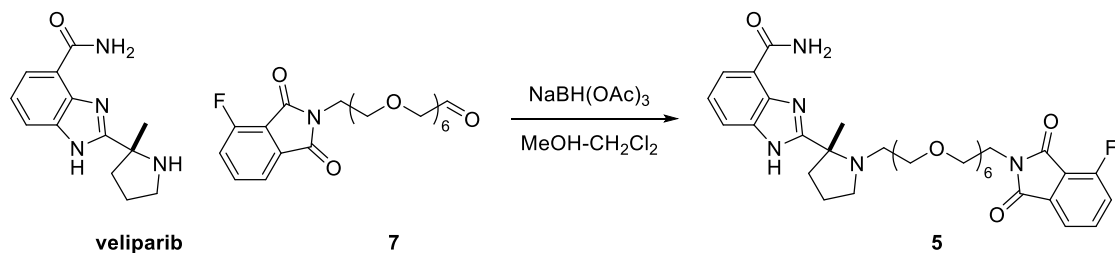

To a 4 mL clear glass vial charged with **7** (9.0 mg, 0.019 mmol, 1.0 equiv) in a mixture of methanol (0.5 mL) and methylene chloride (0.5 mL) was added veliparib (4.6 mg, 0.019 mmol, 1.0 equiv) followed by sodium triacetoxyborohydride (8.1 mg, 0.038 mmol, 2.0 equiv) at 0 °C. After stirring at 23 °C overnight, the solution was concentrated and purified by preparative TLC on silica gel (methanol/methylene chloride 1:10) to afford **5** (8.2 mg, 62%) as a colorless oil:  $R_f = 0.20$  (silica gel, methanol/methylene chloride 1:10);  $^1\text{H NMR}$  (400 MHz, MeOD)  $\delta$  7.86 (d,  $J = 7.6$  Hz, 1H), 7.79 (ddd,  $J = 8.4, 7.3, 4.4$  Hz, 1H), 7.71 (dd,  $J = 8.0, 1.1$  Hz, 1H), 7.65 (d,  $J = 7.3$  Hz, 1H), 7.47 (t,  $J = 8.8$  Hz, 1H), 7.28 (t,  $J = 7.8$  Hz, 1H), 3.82 (t,  $J = 5.7$  Hz, 2H), 3.73 – 3.40 (m, 29H), 2.90 – 2.77 (m, 2H), 2.69 (dt,  $J = 13.3, 4.0$  Hz, 1H), 2.27 – 2.14 (m, 1H), 2.12 – 1.99 (m, 3H), 1.59 (s, 3H);  $^{13}\text{C NMR}$  (150 MHz, MeOD)  $\delta$  170.5, 168.5 (d,  $J = 2.8$  Hz), 166.3, 158.8 (d,  $J = 263.4$  Hz), 138.2 (d,  $J = 7.7$  Hz), 135.7, 123.7, 123.4 (d,  $J = 20.1$  Hz), 122.9, 120.5 (d,  $J = 3.4$  Hz), 118.9 (d,  $J = 12.6$  Hz), 71.53, 71.49, 71.47 (2C), 71.44 (2C), 71.42, 71.40, 71.3, 71.2, 70.5, 68.7, 65.8, 52.3, 50.9, 42.0, 38.5, 23.1, 18.4;  $^{19}\text{F NMR}$  (565 MHz, MeOD)  $\delta$  –116.1; HRMS (ESI): calculated for  $\text{C}_{35}\text{H}_{47}\text{FN}_5\text{O}_9$  ( $\text{M}+\text{H}$ ) $^+$  700.3352, found 700.3351.

*General procedure for comparing the retention times of the nucleophilic aromatic substitution reaction products*

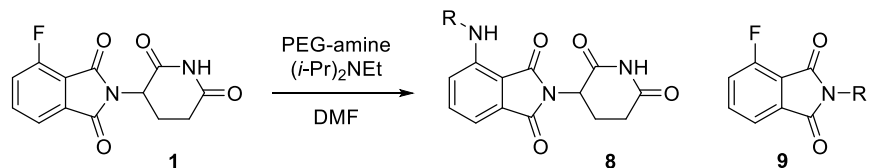

To a 4 mL clear glass vial charged with **1** (28 mg, 0.10 mmol, 1.0 equiv) in *N,N*-dimethylformamide (1 mL) was added PEG-amine (0.10 mmol, 1.0 equiv) and *N,N*-diisopropylethylamine (26 mg, 0.20 mmol, 1.0 equiv, 35  $\mu\text{L}$ ) at 23 °C. After stirring at 90 °C overnight, the reaction mixture was analyzed by LC–MS using the ion extraction method to compare the retention times of **8** and **9**.

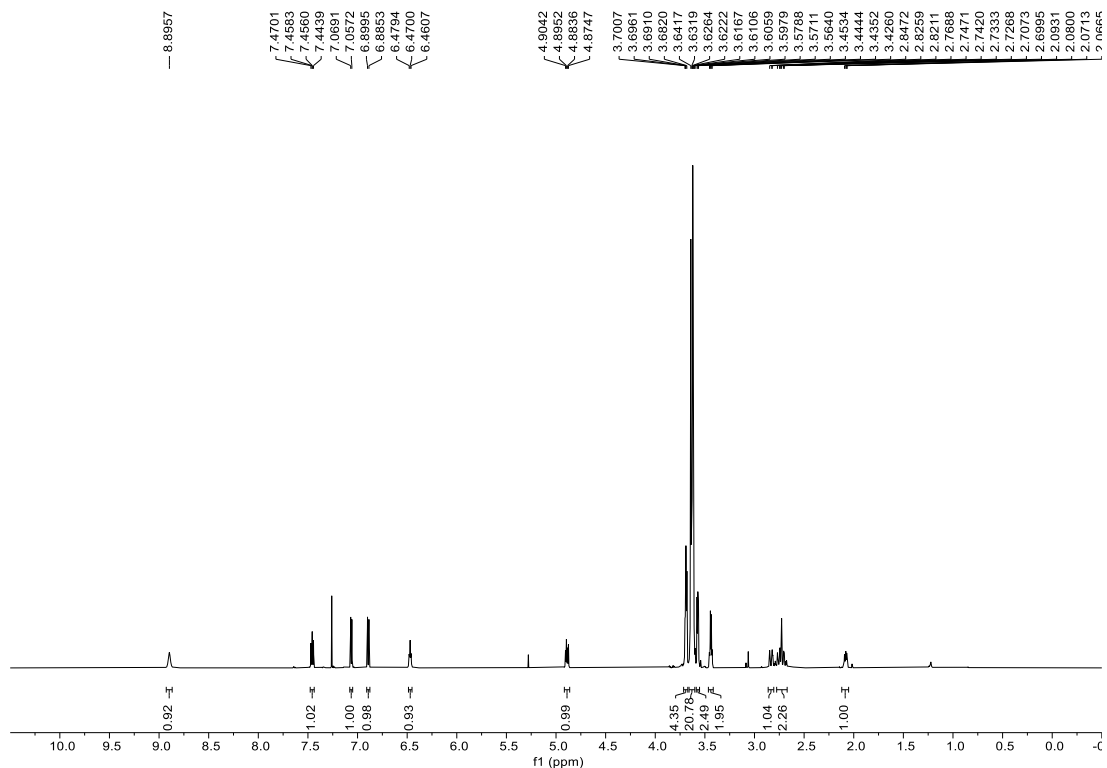

$^1\text{H}$  NMR spectrum of **3** (600 MHz,  $\text{CDCl}_3$ )

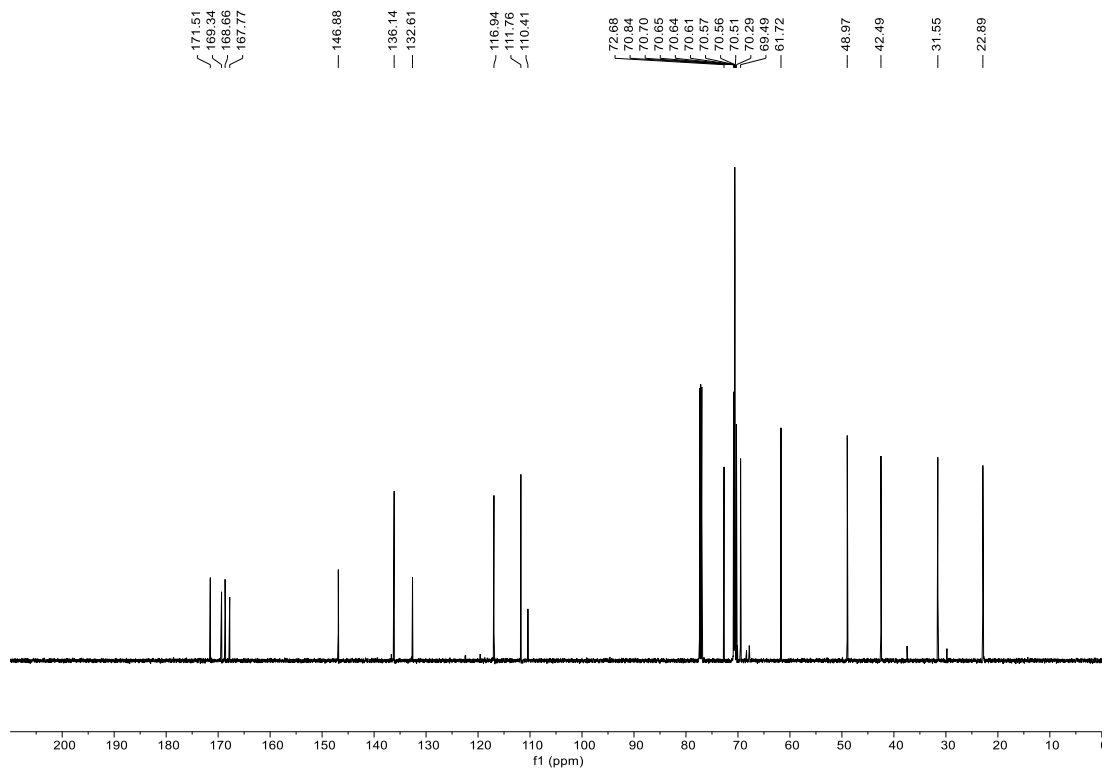

$^{13}\text{C}$  NMR spectrum of **3** (150 MHz,  $\text{CDCl}_3$ )

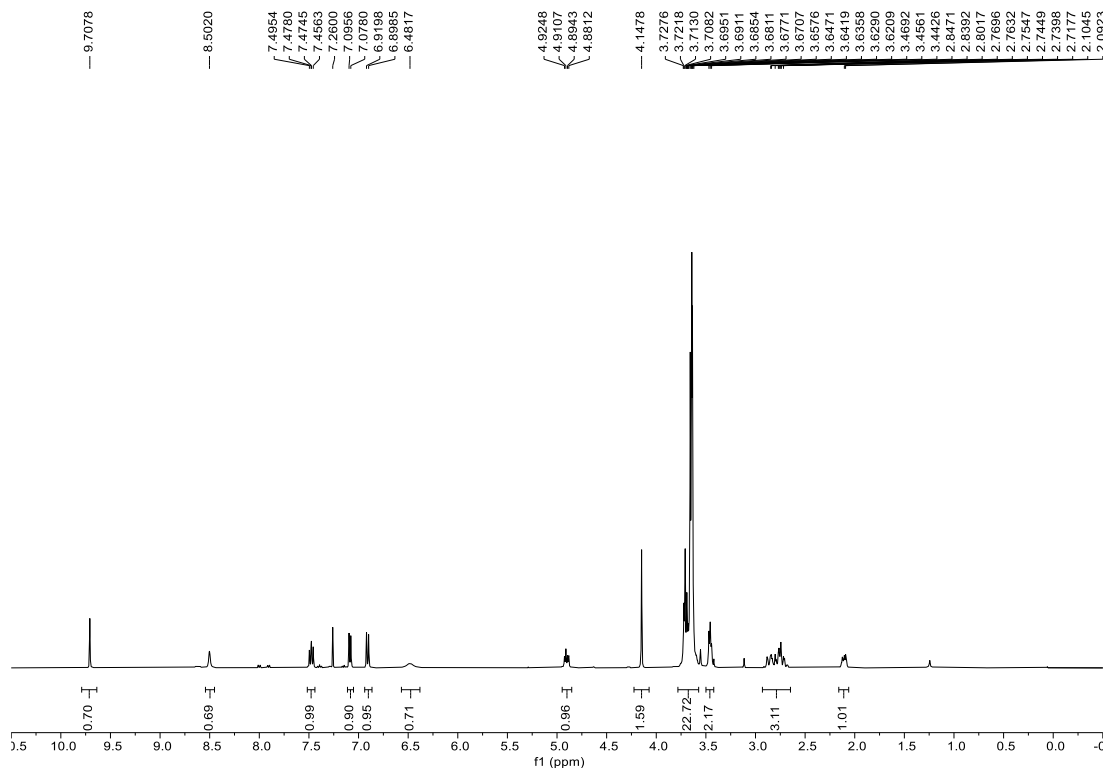

$^1\text{H}$  NMR spectrum of **4** (400 MHz,  $\text{CDCl}_3$ )

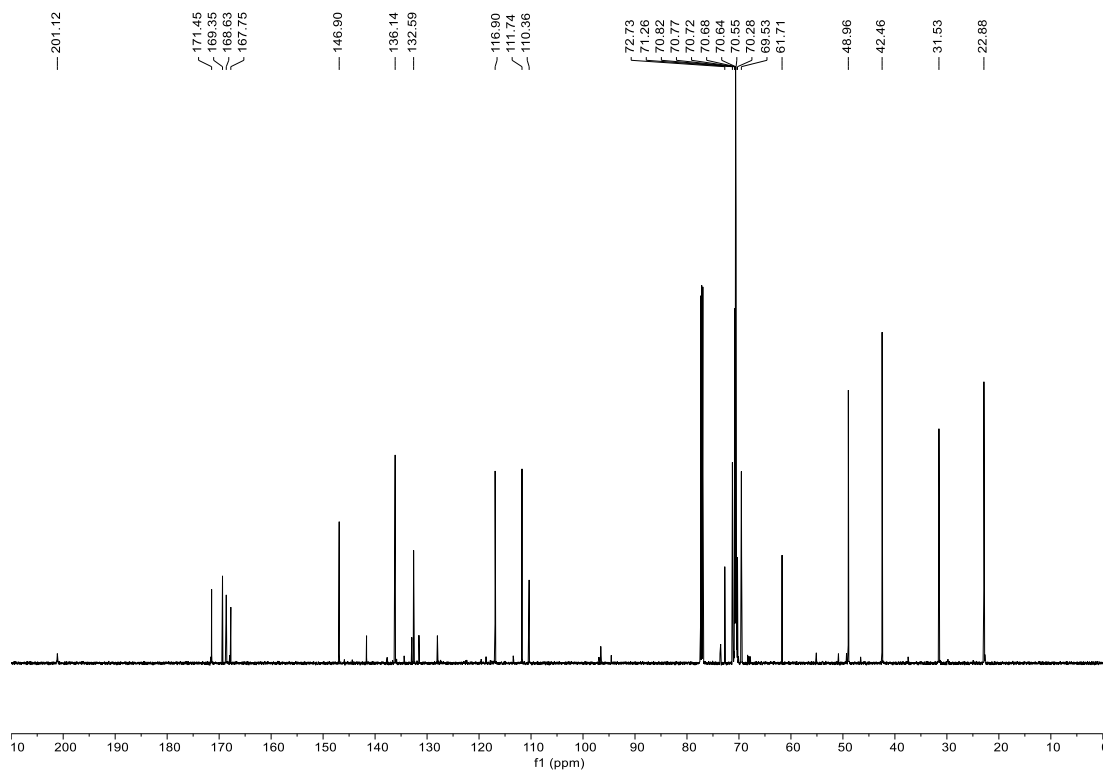

$^{13}\text{C}$  NMR spectrum of **4** (150 MHz,  $\text{CDCl}_3$ )

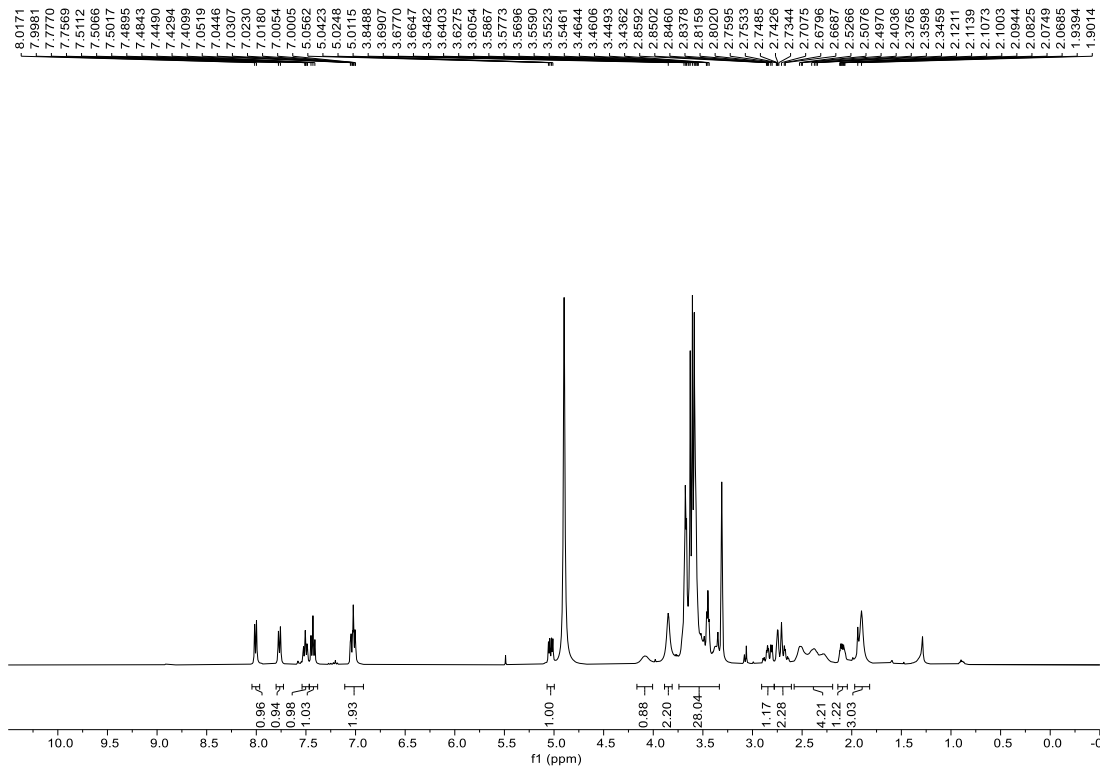

$^1\text{H}$  NMR spectrum of iVeliparib-AP6 (400 MHz,  $\text{CD}_3\text{OD}$ )

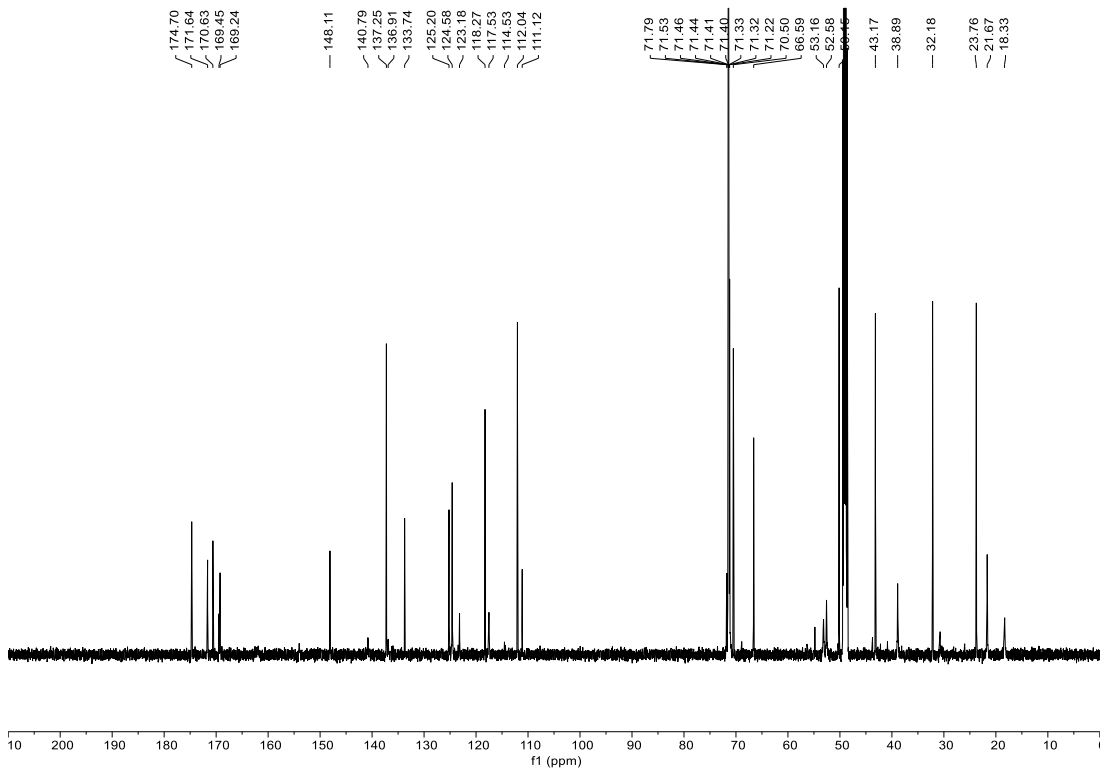

$^{13}\text{C}$  NMR spectrum of iVeliparib-AP6 (150 MHz,  $\text{CD}_3\text{OD}$ )

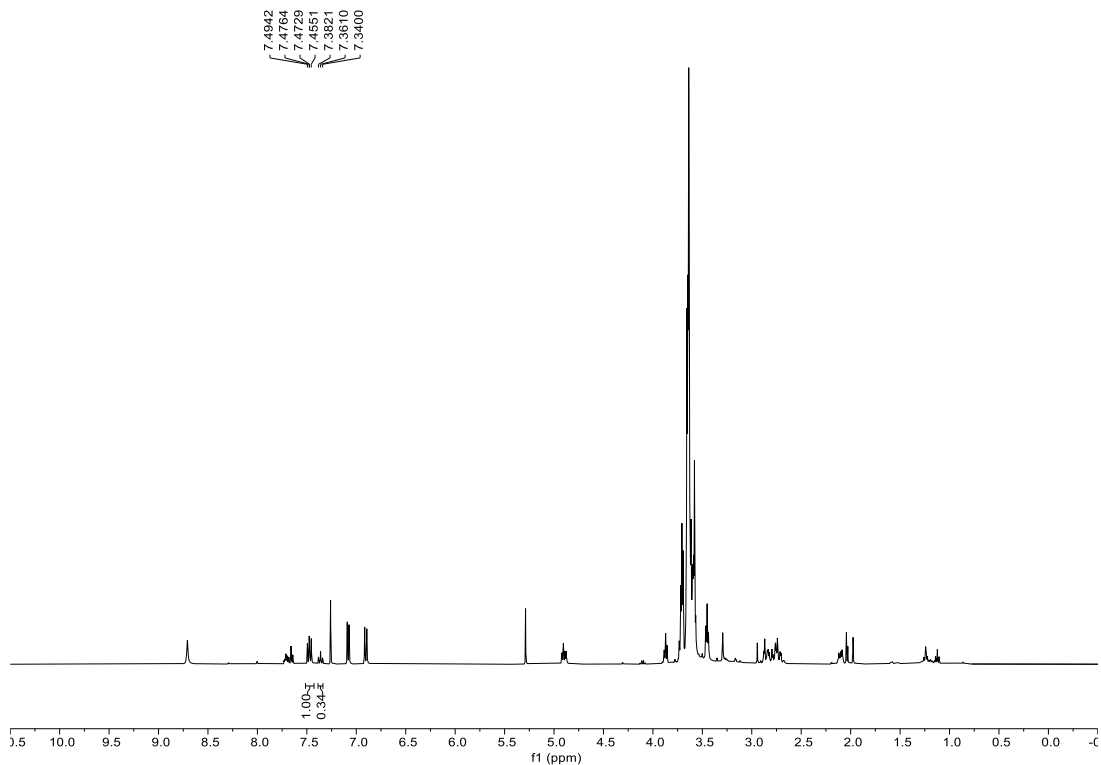

$^1\text{H}$  NMR spectrum of the mixture of **3** and **6** (400 MHz,  $\text{CDCl}_3$ )

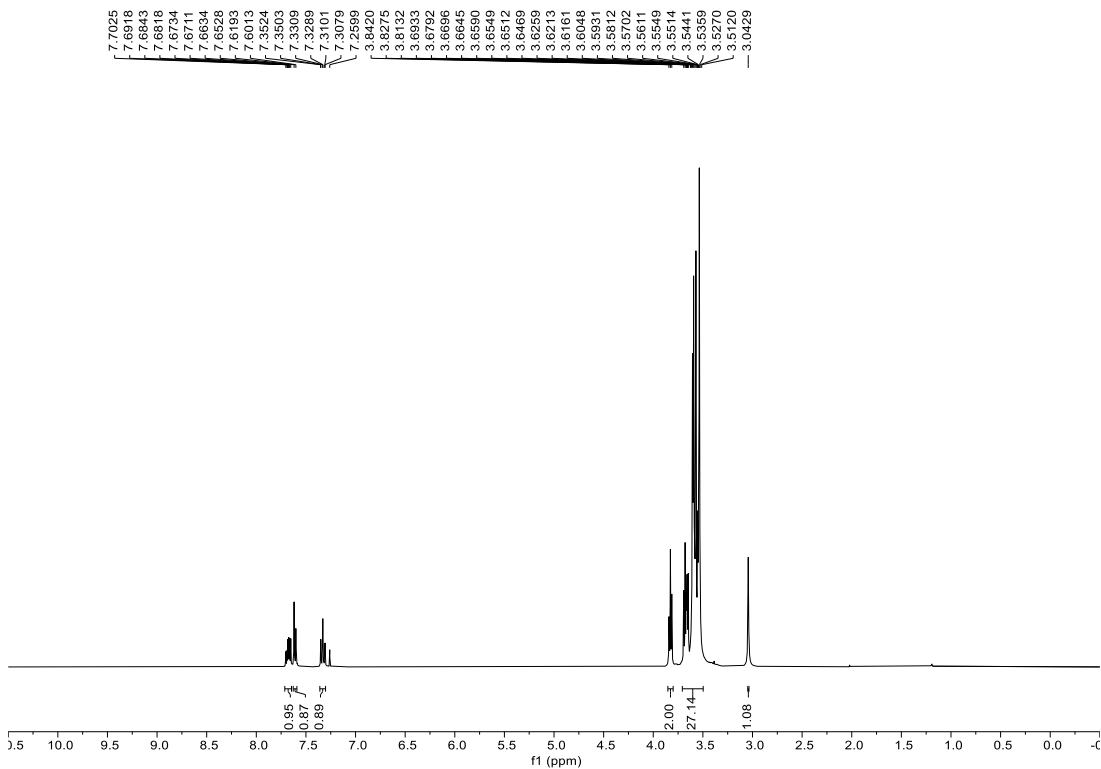

$^1\text{H}$  NMR spectrum of **6** (600 MHz,  $\text{CDCl}_3$ )

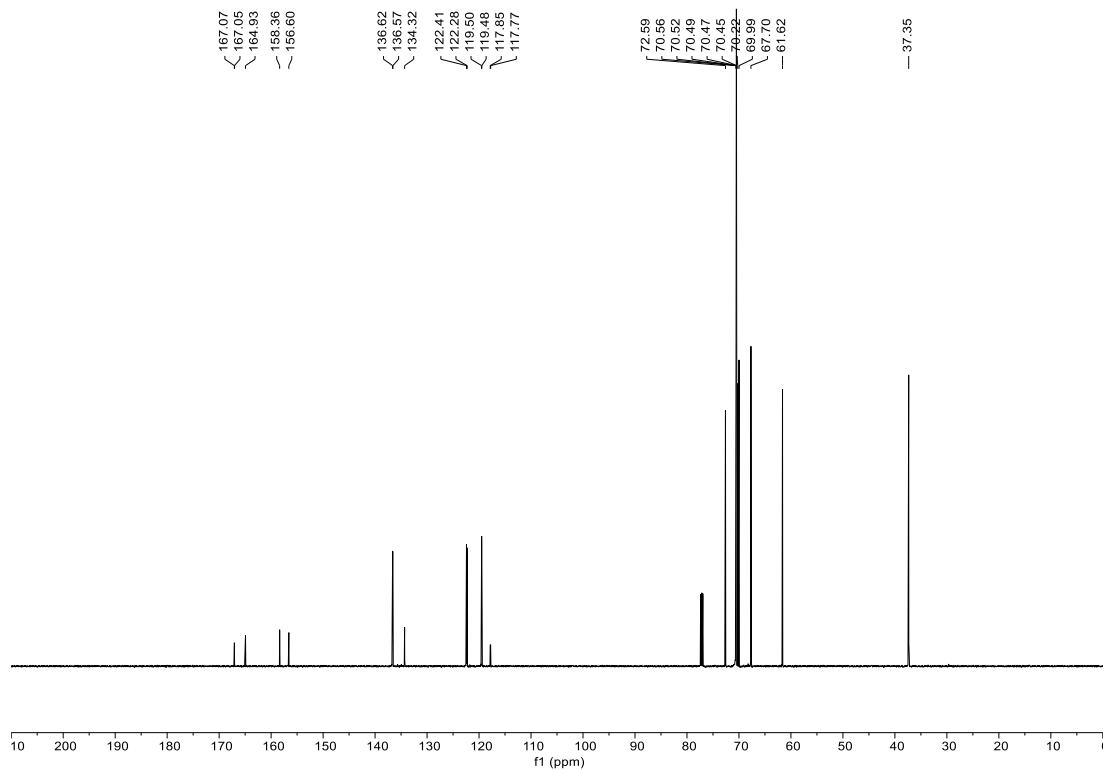

<sup>13</sup>C NMR spectrum of **6** (150 MHz, CDCl<sub>3</sub>)

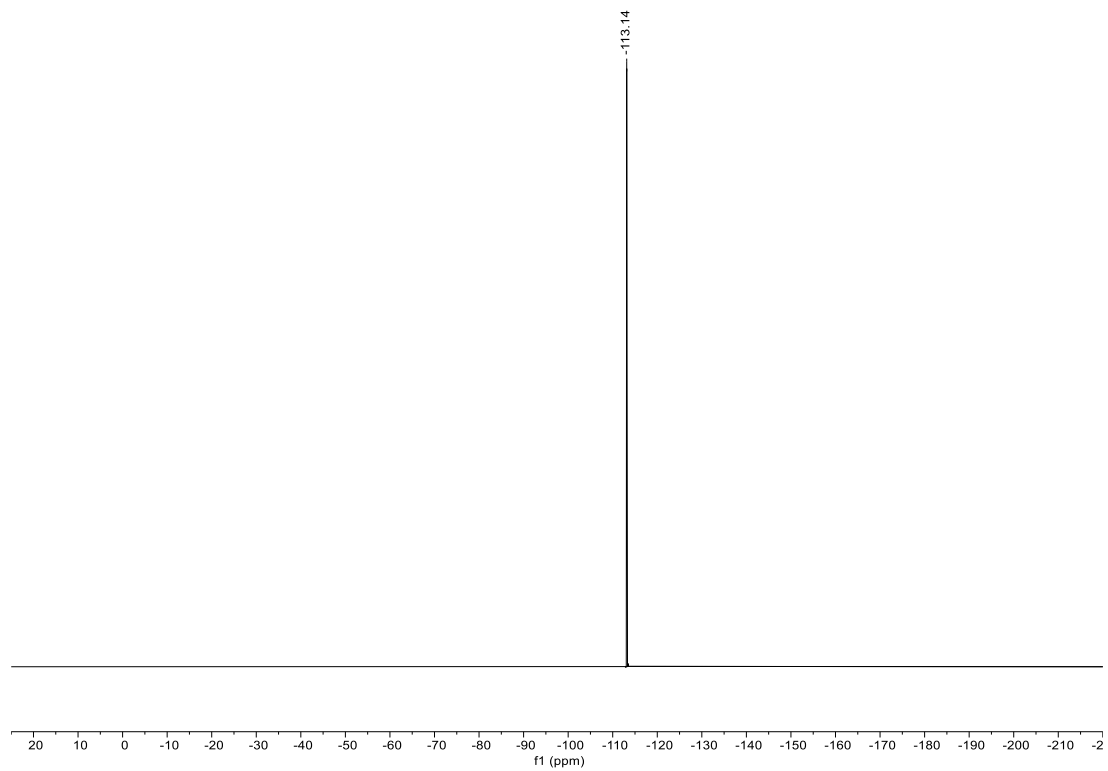

<sup>19</sup>F NMR spectrum of **6** (565 MHz, CDCl<sub>3</sub>)



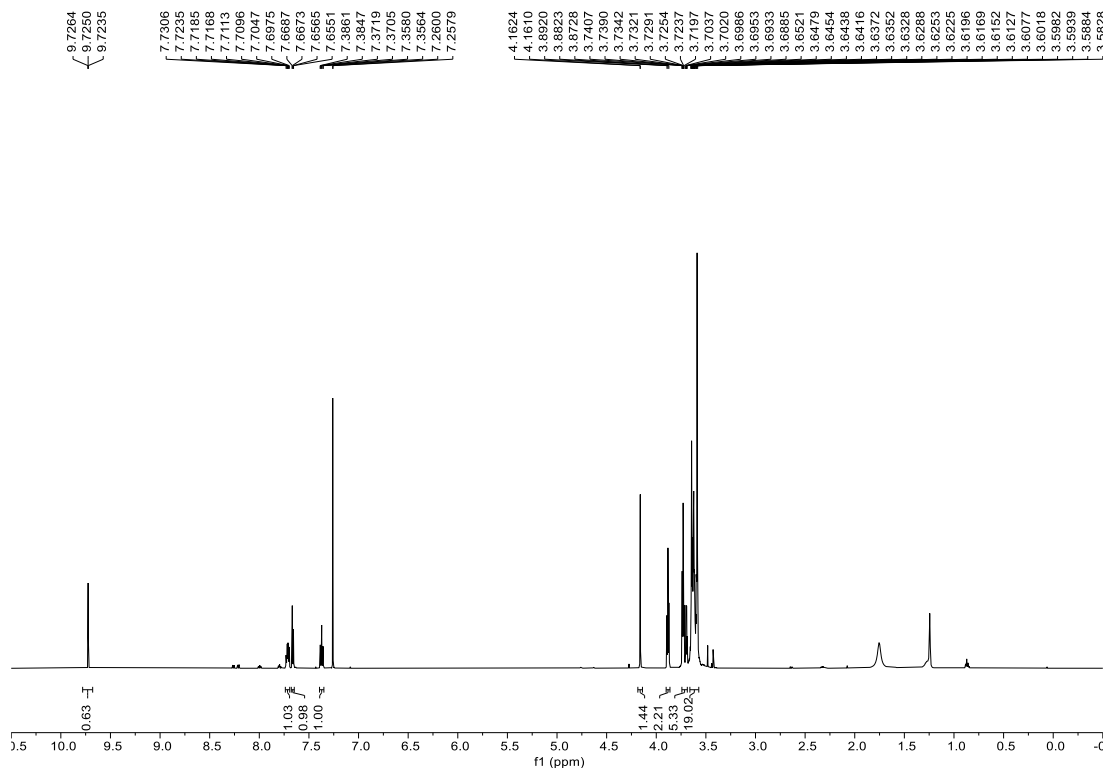

$^1\text{H}$  NMR spectrum of **7** (600 MHz,  $\text{CDCl}_3$ )

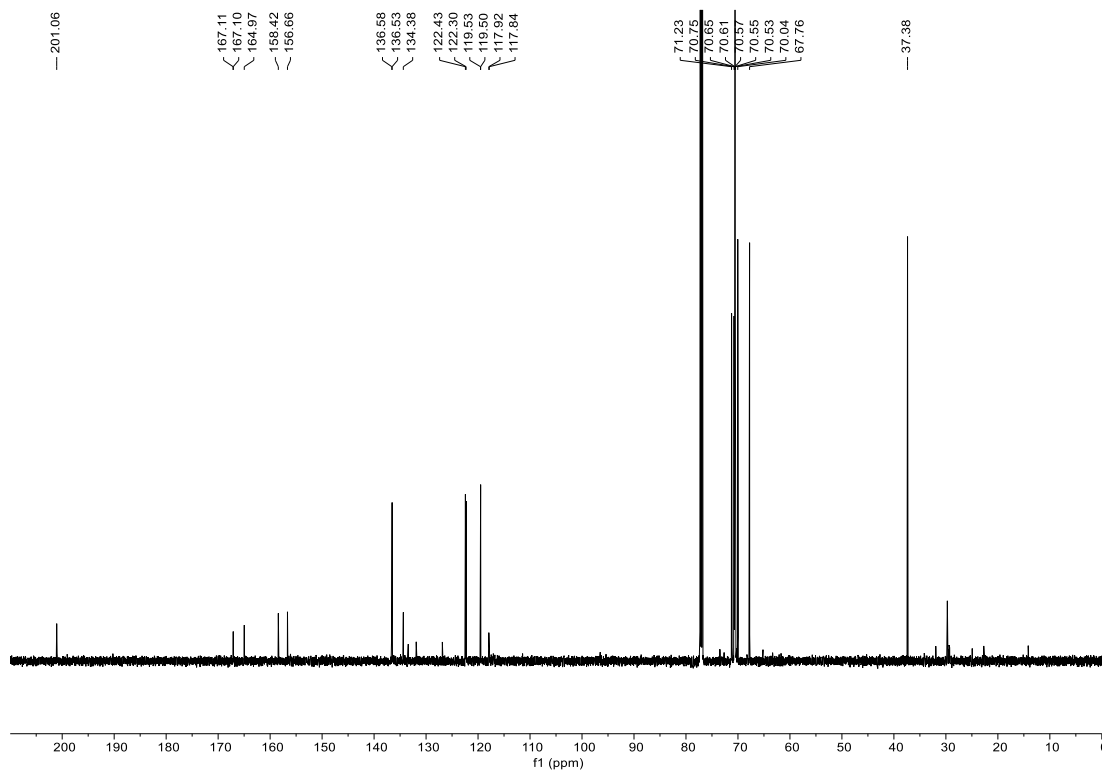

$^{13}\text{C}$  NMR spectrum of **7** (150 MHz,  $\text{CDCl}_3$ )

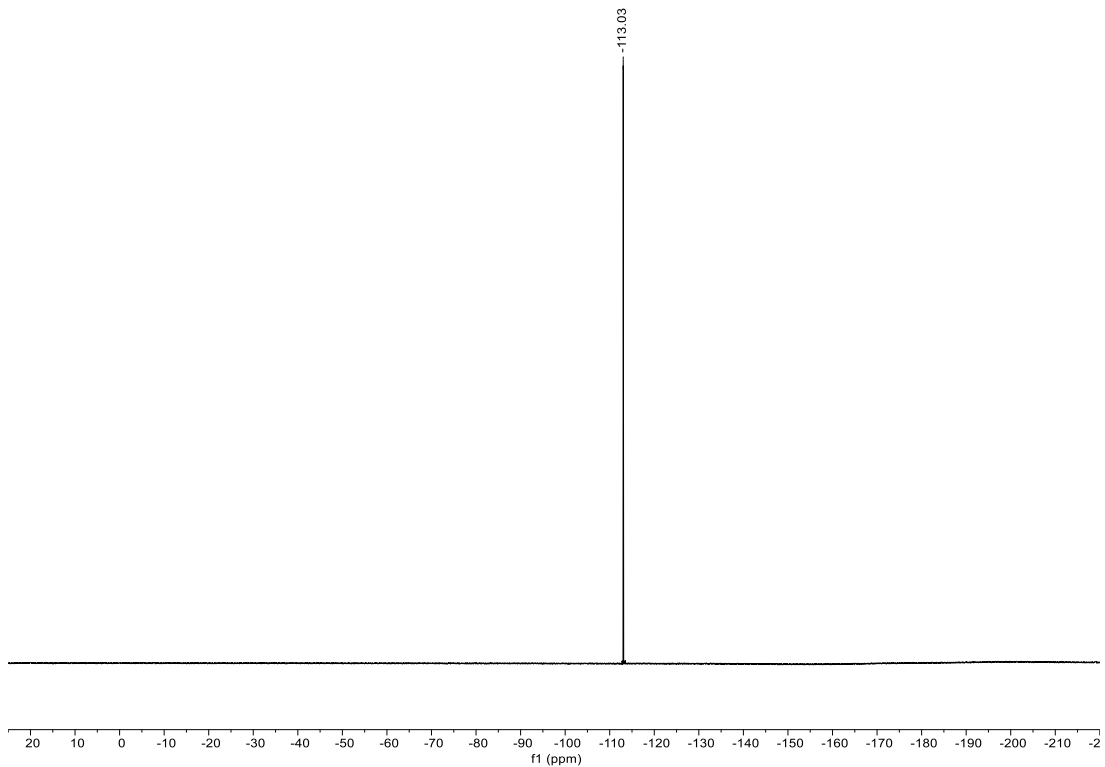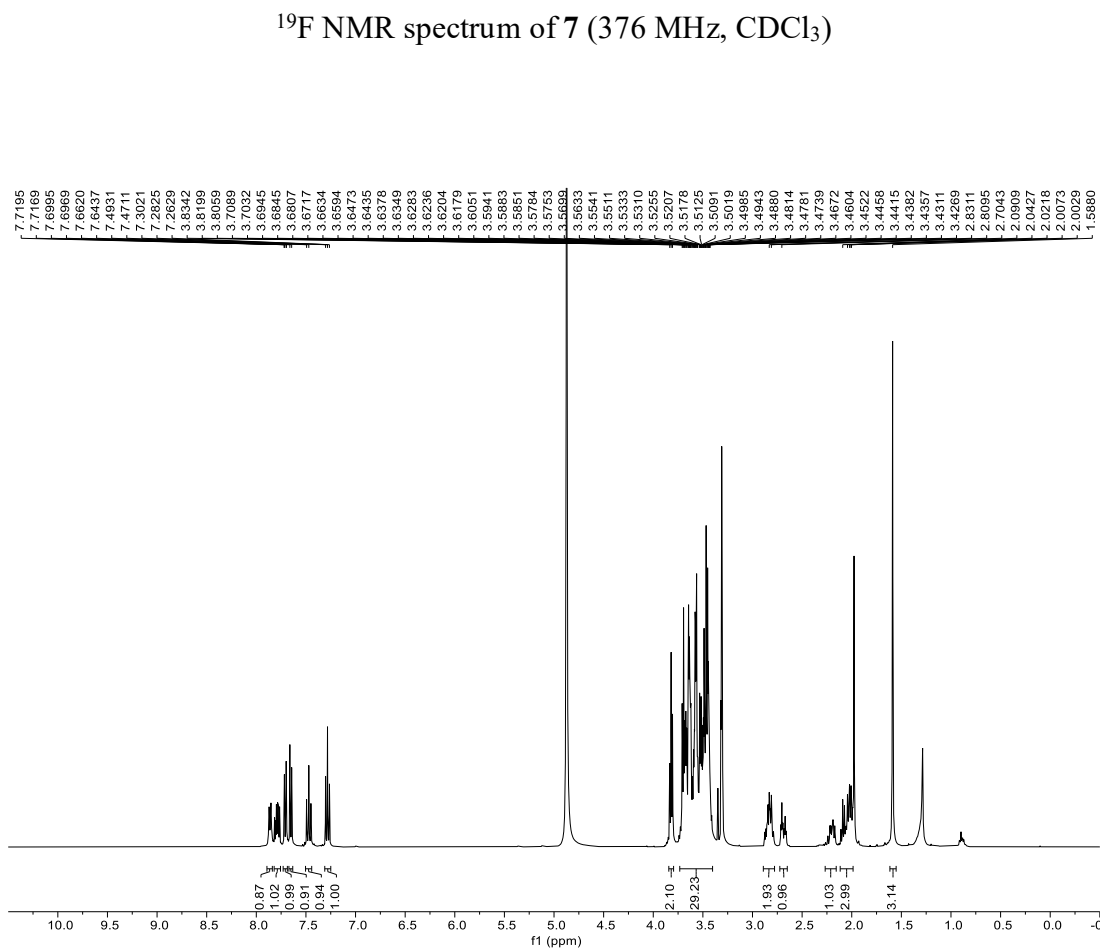

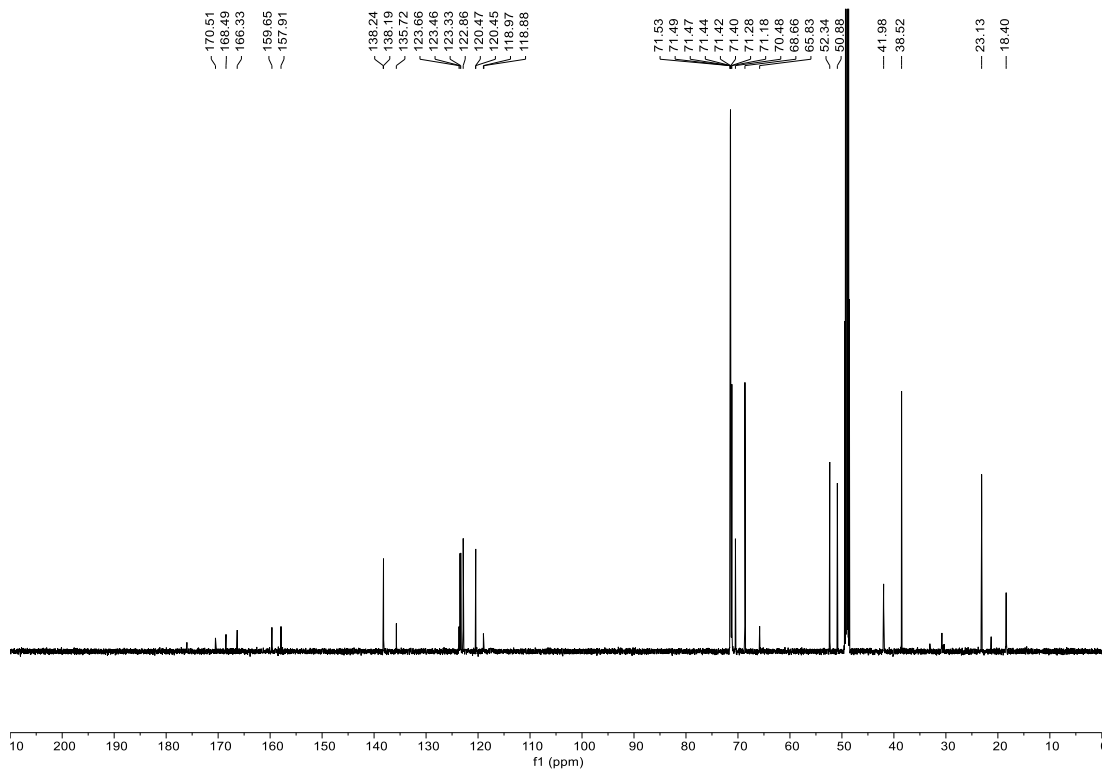

$^{13}\text{C}$  NMR spectrum of **5** (150 MHz,  $\text{CD}_3\text{OD}$ )

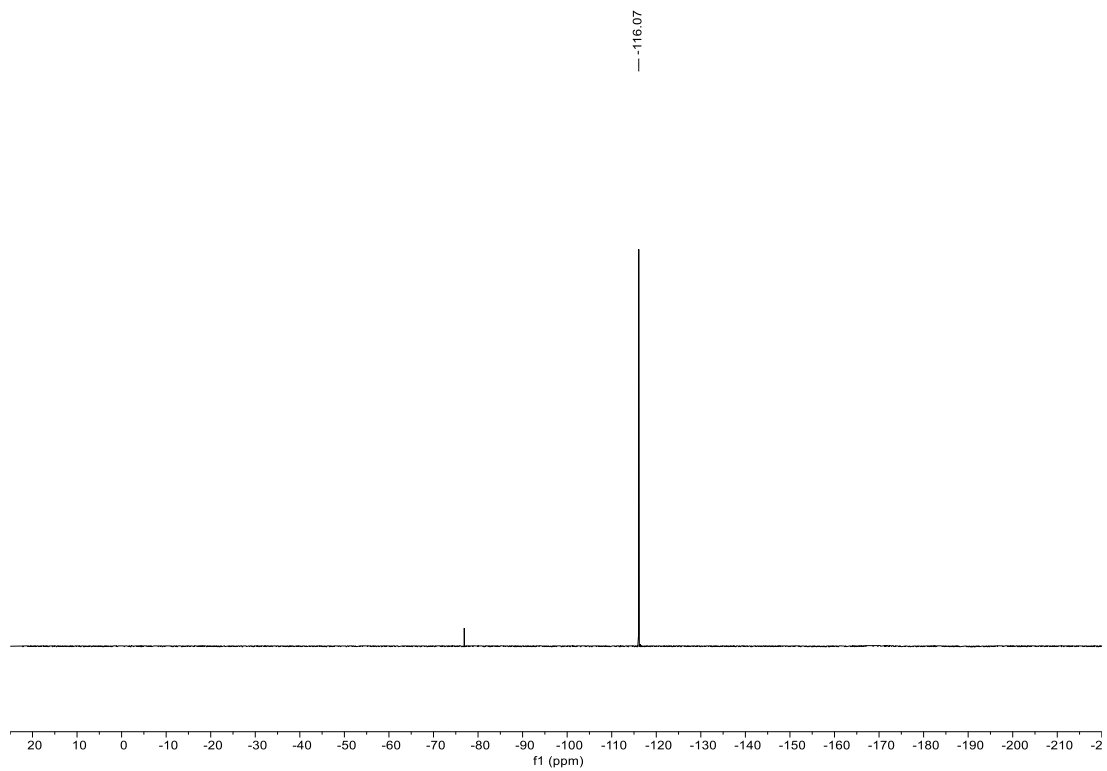

$^{19}\text{F}$  NMR spectrum of **5** (565 MHz,  $\text{CD}_3\text{OD}$ )

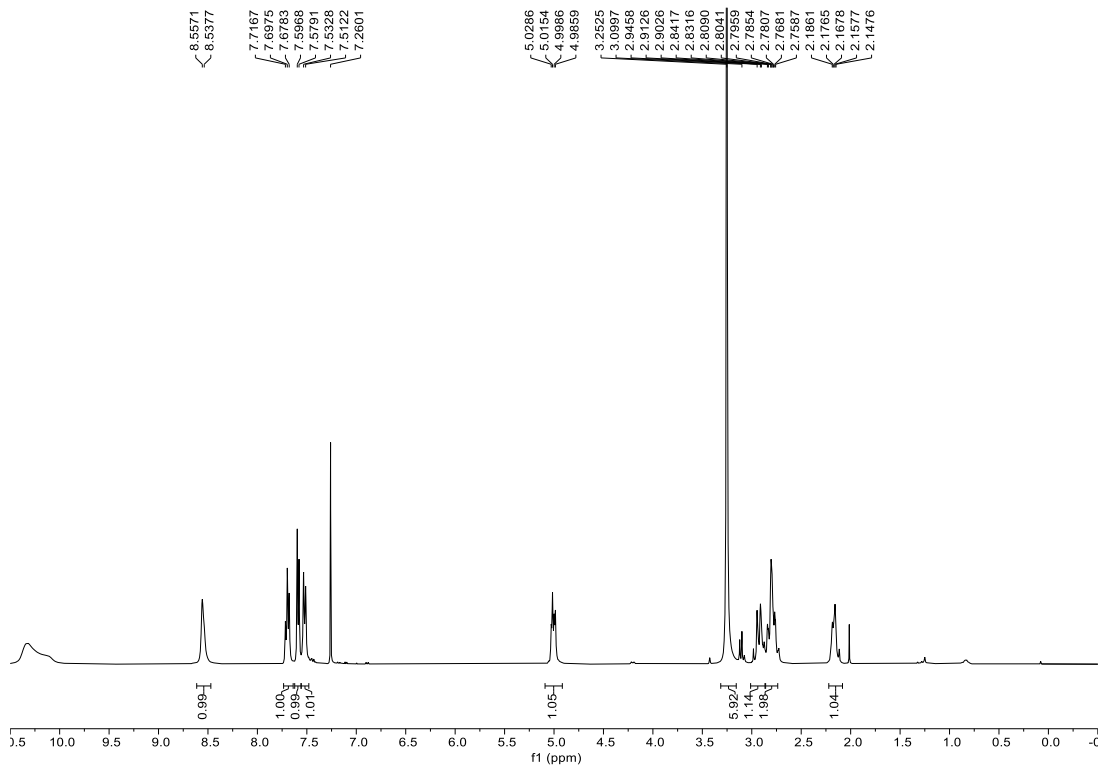

$^1\text{H}$  NMR spectrum of **S1** (400 MHz,  $\text{CDCl}_3$ )

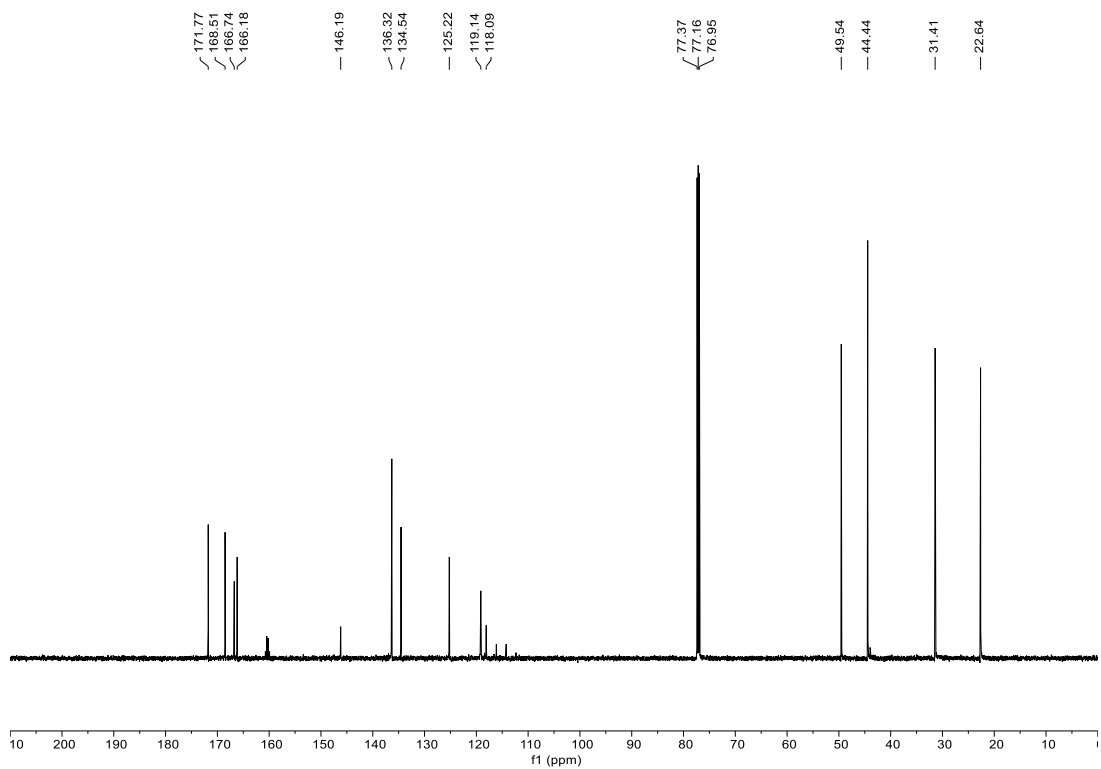

$^{13}\text{C}$  NMR spectrum of **S1** (150 MHz,  $\text{CDCl}_3$ )

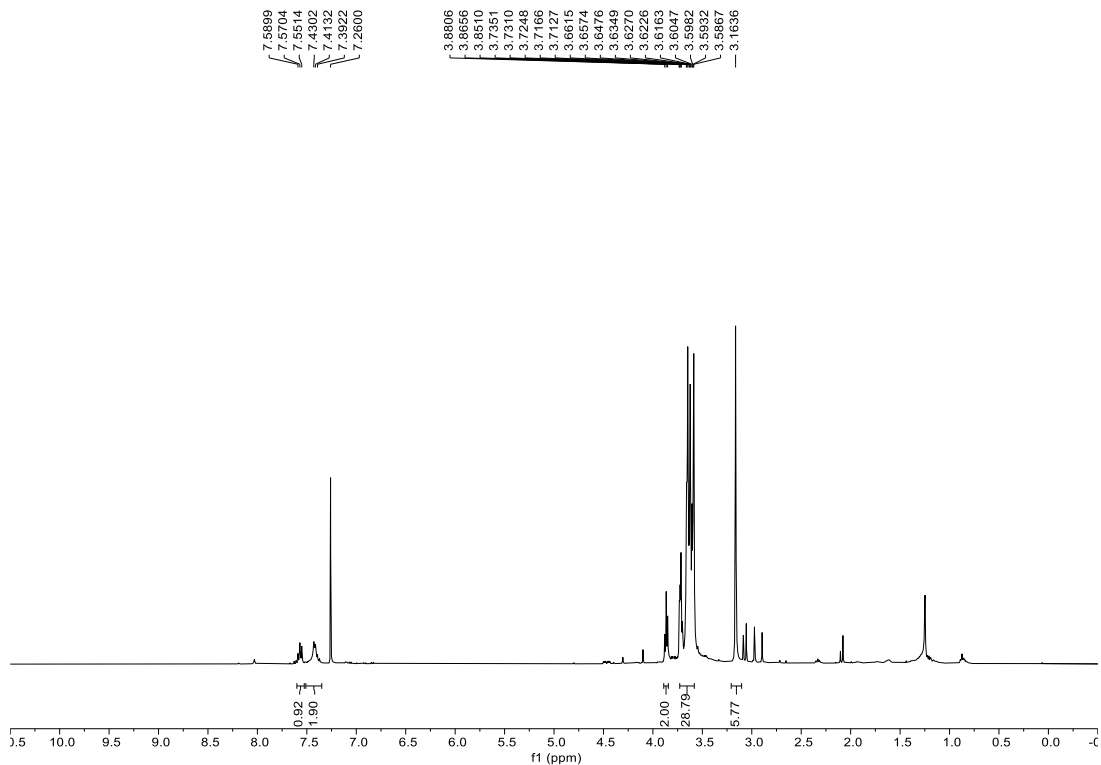

$^1\text{H}$  NMR spectrum of **S2** (400 MHz,  $\text{CDCl}_3$ )

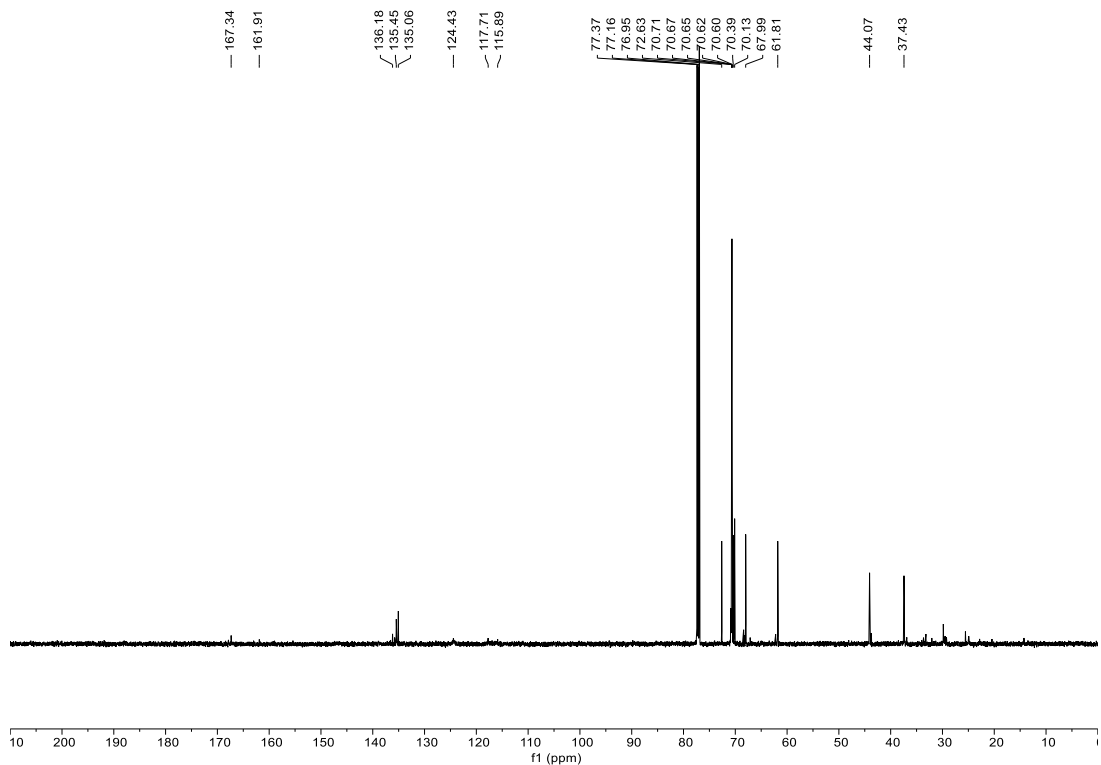

$^{13}\text{C}$  NMR spectrum of **S2** (150 MHz,  $\text{CDCl}_3$ )
